# Supplementary material for: Ultra-bright alkylated graphene quantum dots
Source: Royal Society of Chemistry journal article supplement (doi:10.1039/c4nr03506b), 2014-01-01
Supplement: c4nr03506b1.pdf [file c4nr03506b1.pdf]

## Ultra-bright Alkylated Graphene Quantum Dots

Lan Feng, Xing-Yan Tang, Yun-Xin Zhong, Yue-Wen Liu, Xue-Huan Song, Shun-Liu Deng,\*

Su-Yuan Xie, Jia-Wei Yan, and Lan-Sun Zheng

Department of Chemistry, State Key Laboratory of Physical Chemistry of Solid Surface, College of Chemistry and Chemical Engineering, Xiamen University, Xiamen, 361005, China.

\* To whom correspondences should be addressed. E-mail: sldeng@xmu.edu.cn.

### 1. AGQDs formed in precipitates after solvothermal reaction of PAGenes

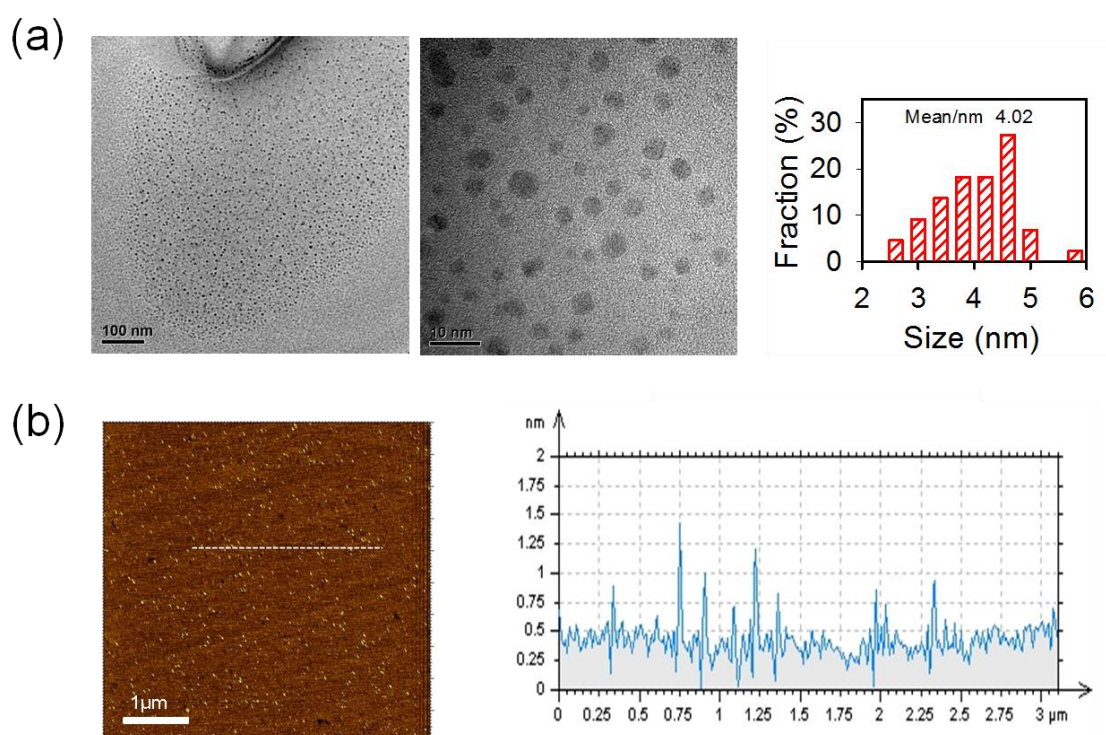

**Fig. S1** AGQDs formed in precipitates after solvothermal reaction of PAGenes. (a) TEM image and size distribution of AGQDs. (b) AFM image and the corresponding height profile of a line scan.

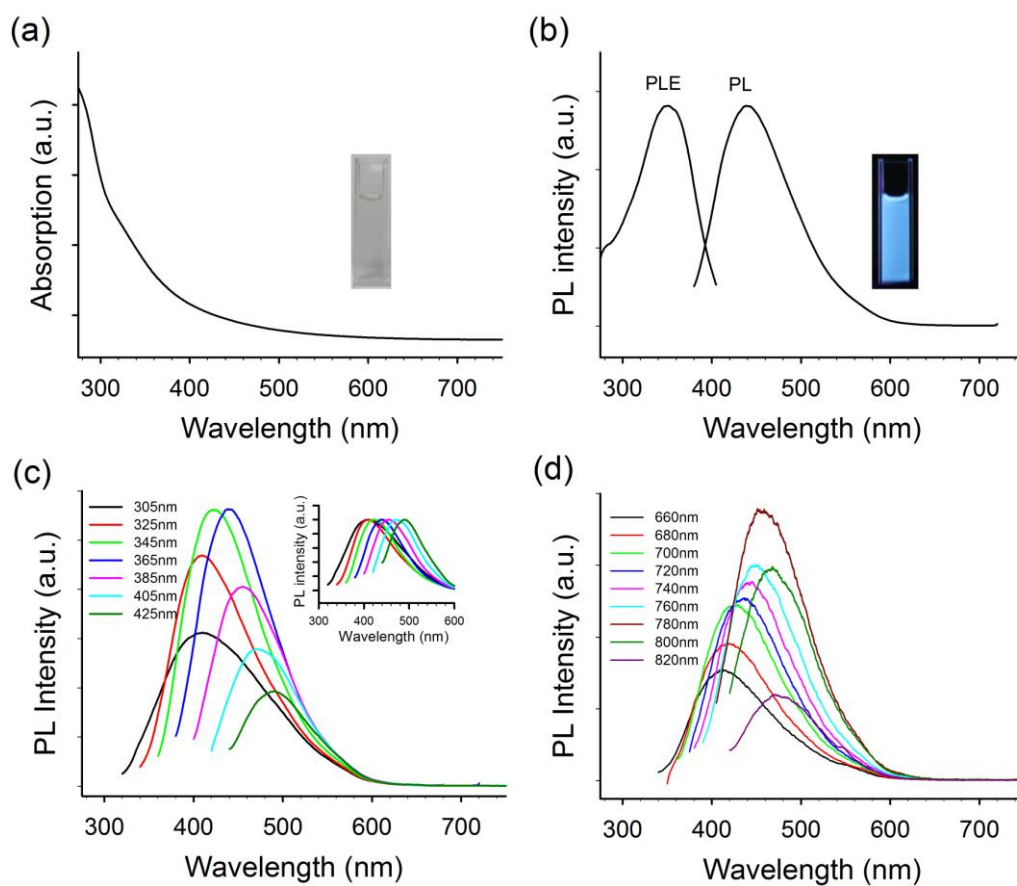

**Fig. S2** The optical properties of AGQDs formed in precipitates after solvothermal reaction of PAGens. (a) UV-Vis absorption spectrum of AGQDs in DMF dispersion (inset: photograph taken under visible light), (b) PL at 365 nm excitation and PLE with the detection wavelength of 440 nm of AGQDs (inset: photograph taken under 365 nm UV light irradiation), (c) the excitation-dependent PL behavior of AGQDs (inset: normalized to the spectral peaks), and (d) the upconversion PL properties of AGQDs.

## 2. AGQDs dispersed in various solvents

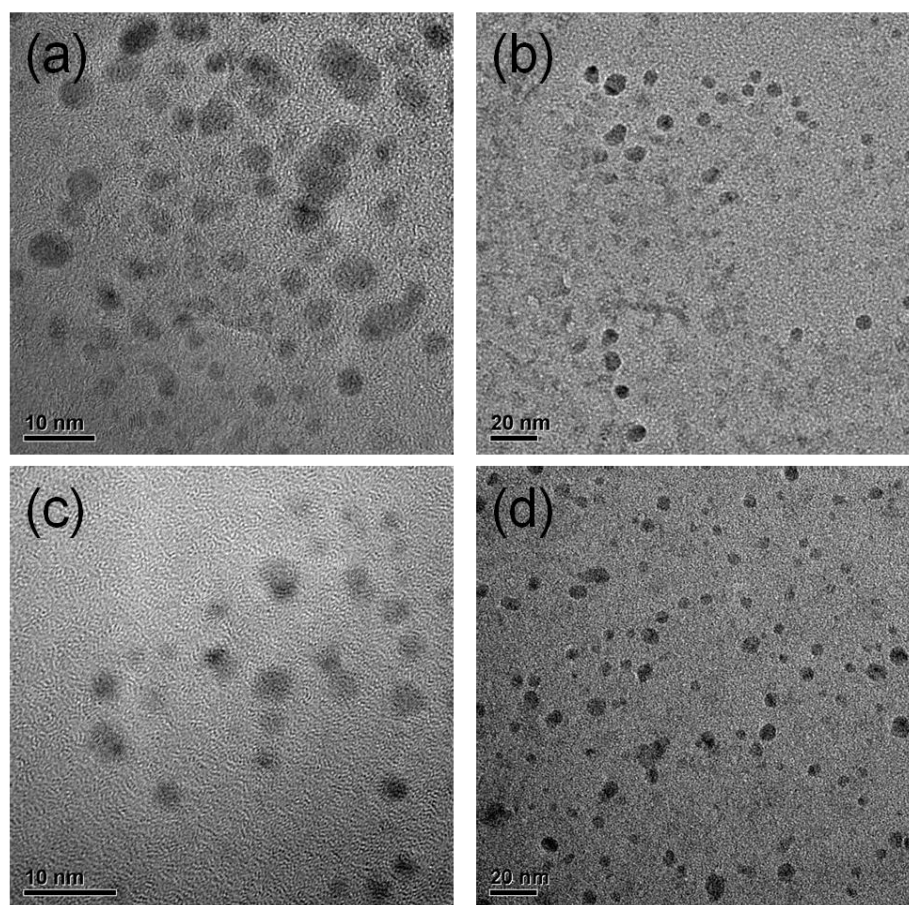

**Fig. S3** TEM images of AGQDs dispersed in H<sub>2</sub>O (a), ethanol (b), NMP (c), and cyclohexane (d), respectively.

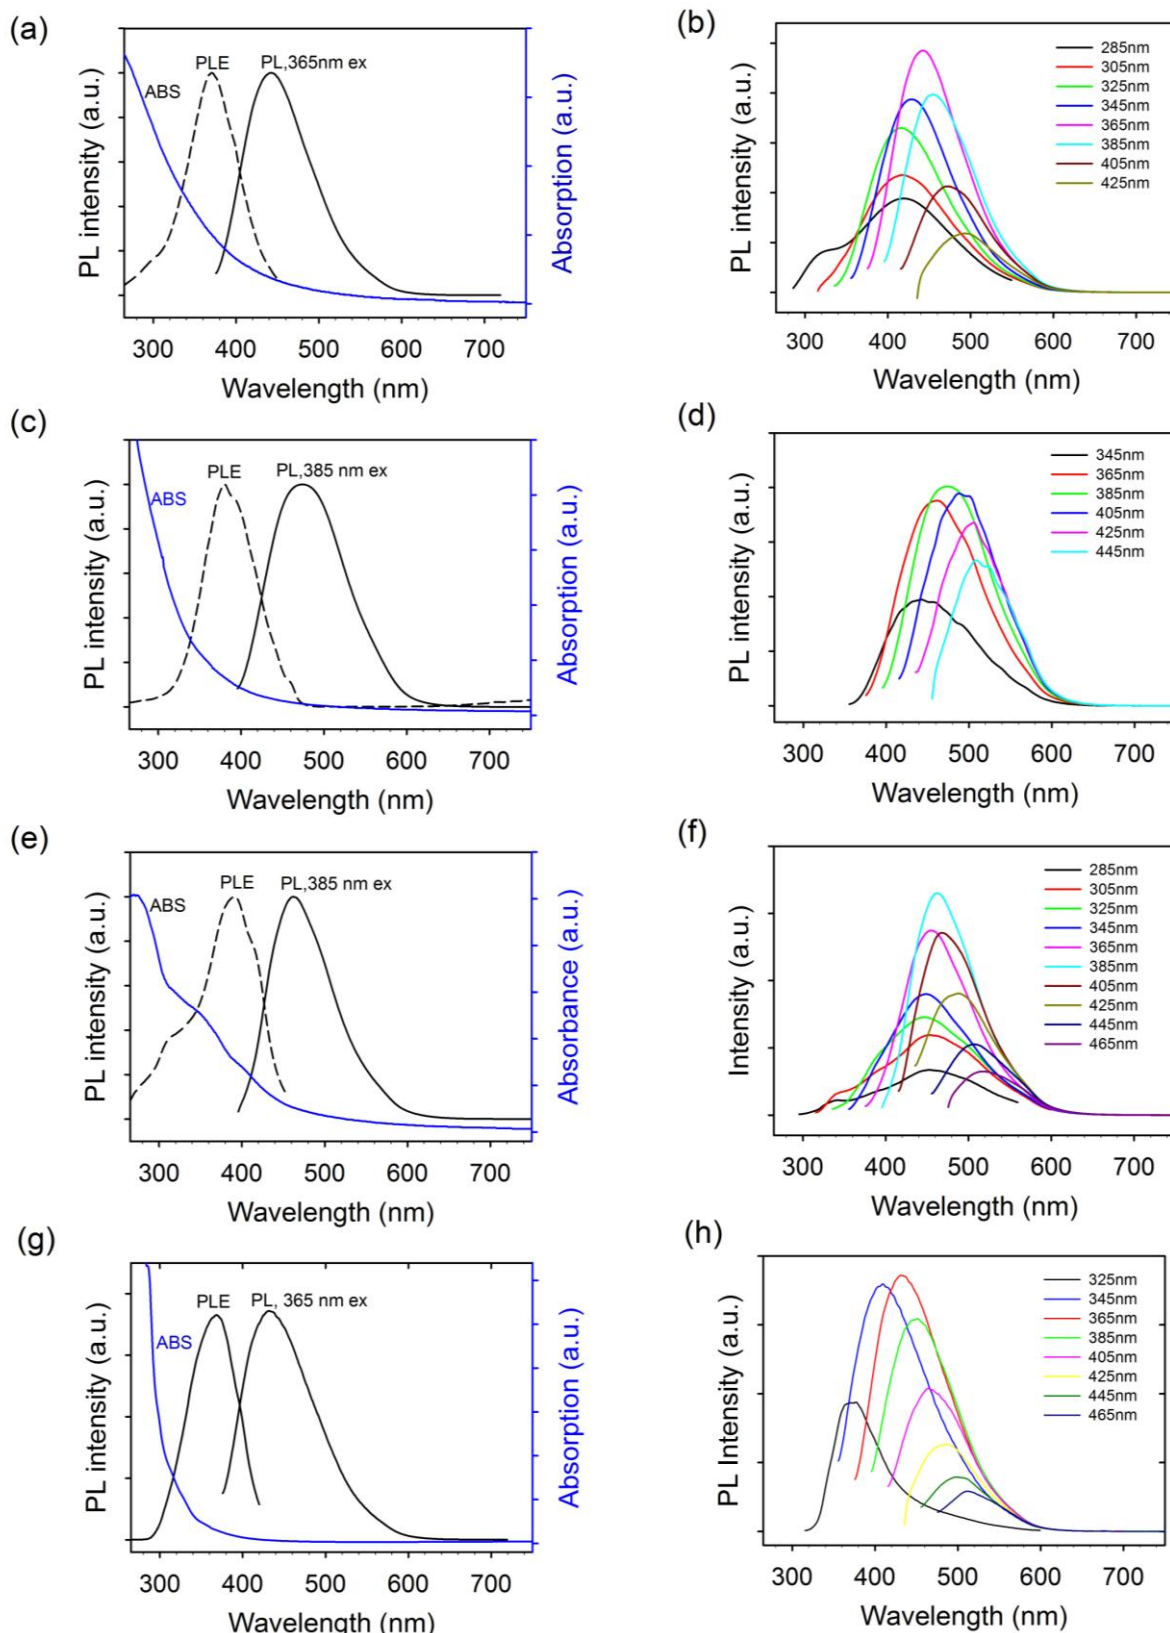

**Fig. S4** Optical properties of AGQDs dispersed in H<sub>2</sub>O (a, b), ethanol (c, d), NMP (e, f), and cyclohexane (g, h), respectively.

### 3. AGQDs fabricated from PAGenes-COOR by solvothermal route

(a)

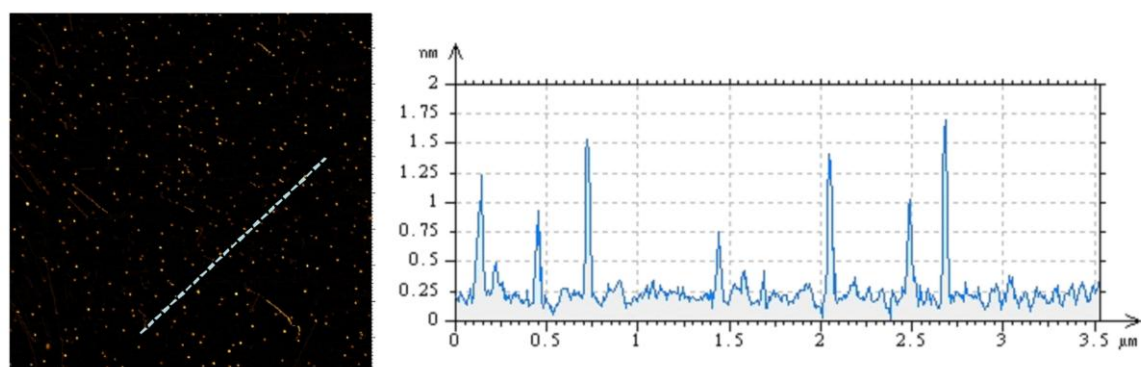

(b)

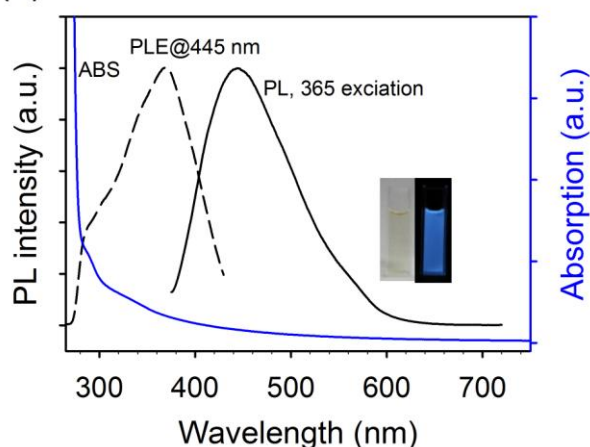

(c)

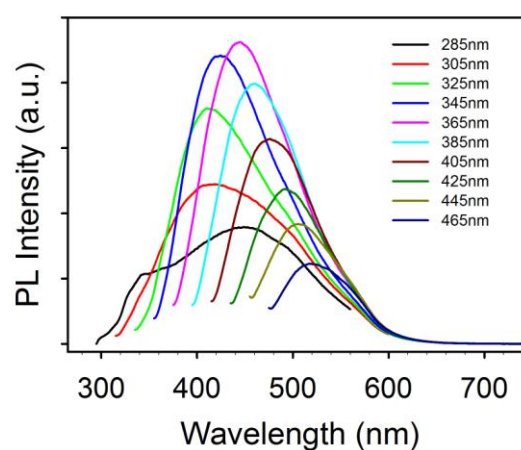

**Fig. S5** AGQDs fabricated from PAGenes-COOR by solvothermal route. (a) AFM image and the corresponding height profile of a line scan, (b) UV-Vis absorption spectrum (ABS), PL spectrum at 365 nm excitation, and PLE with the detection wavelength of 445 nm of AGQDs in DMF dispersion (inset: photograph taken under visible and 365 nm UV light irradiation), (c) the excitation-dependent PL behaviors of AGQDs.

### 4. Quantum yield measurement of AGQDs and OAGQDs.

Using Rhodamine B in ethanol (quantum yield = 0.65) as a reference, the PL quantum yield of AGQDs (in DMF) and OAGQDs (in water) were calculated according to:

$$\phi = \phi_{st} (I_x / I_{st}) (\eta_x^2 / \eta_{st}^2) (A_{st} / A_x)$$

Where  $\phi$  is the quantum yield,  $I$  is the measured integrated emission intensity,  $\eta$  is the refractive index of the solvent, and  $A$  is the optical density. The subscript “ $st$ ” refers to the reference with known quantum yield, and the subscript “ $x$ ” refers to the sample. To minimize re-absorption



effects, absorption in the 10 mm fluorescence cuvette was kept below 0.10 at the excitation wavelength (365 nm). For AGQDs, the quantum yield was measured for three different batch samples and averaged.

**Table S1** Quantum yield of AGQDs\* and OAGQDs using Rhodamine B as a reference

| Sample      | Integrated emission intensity ( $I$ ) | Abs. at 365 nm ( $A$ ) | Refractive index of solvent ( $\eta$ ) | Quantum Yield ( $\phi$ ) |
|-------------|---------------------------------------|------------------------|----------------------------------------|--------------------------|
| Rhodamine B | 67216.119                             | 0.034889               | 1.36                                   | 0.65 (known)             |
| AGQDs (1)   | 86068.6                               | 0.04717                | 1.43                                   | 0.6806                   |
| AGQDs (2)   | 51127.982                             | 0.031634               | 1.43                                   | 0.6029                   |
| AGQDs (3)   | 98333.108                             | 0.055753               | 1.43                                   | 0.6579                   |
| OAGQDs      | 2865.765                              | 0.045744               | 1.33                                   | 0.08558                  |

\*The average quantum yield of AGQDs is calculated to be ~ 65%.

## 5. Solution $^1\text{H}$ NMR spectroscopy of AGQDs

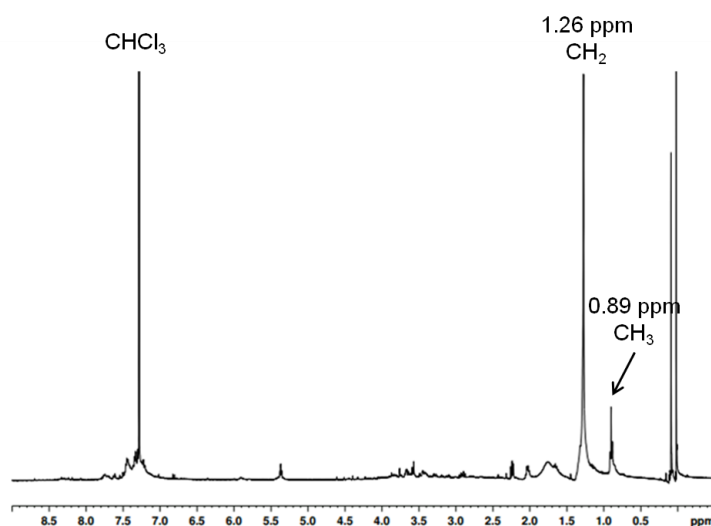

**Fig. S6**  $^1\text{H}$  NMR spectrum of AGQDs dispersed in  $\text{CDCl}_3$ . The signals for aliphatic  $\text{CH}_2$  at 1.26 and  $\text{CH}_3$  at 0.89 ppm clearly prove the presence of alkyl groups on AGQDs.

## 6. Thermogravimetric analysis (TGA) of AGQDs

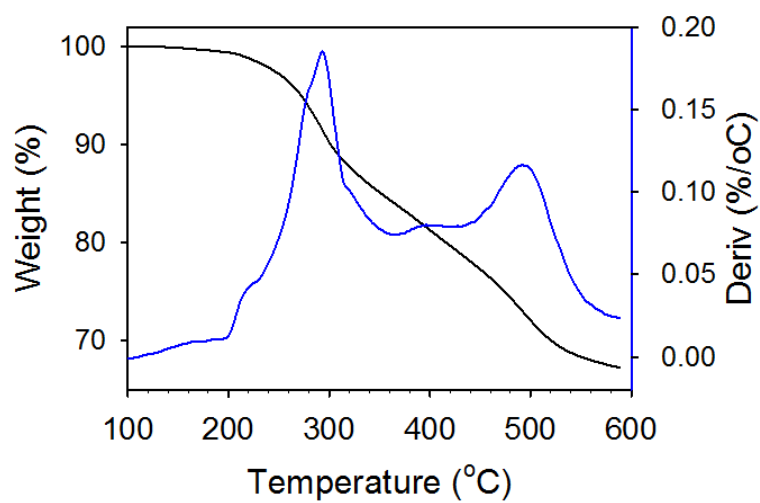

**Fig. S7** TGA analysis of the synthesized AGQDs.

## 7. Solvothermal cutting of PAGenes versus GOs

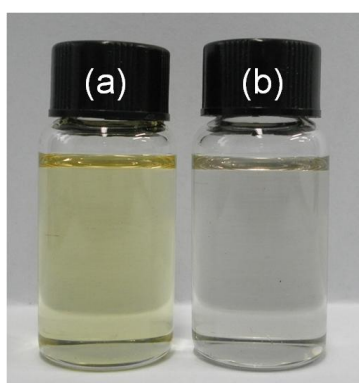

**Fig. S8** Photographs of dispersions obtained from PAGenes (a) and GOs (b) by solvothermal route (200°C, 20h), followed by centrifugation at 14000 rpm for 10 min. Note that the dosage of GOs (35 mg) is ten times the weight of PAGenes (3.5 mg) in solvothermal reaction.

## 8. Structural and chemical composition characterization of PAGenes

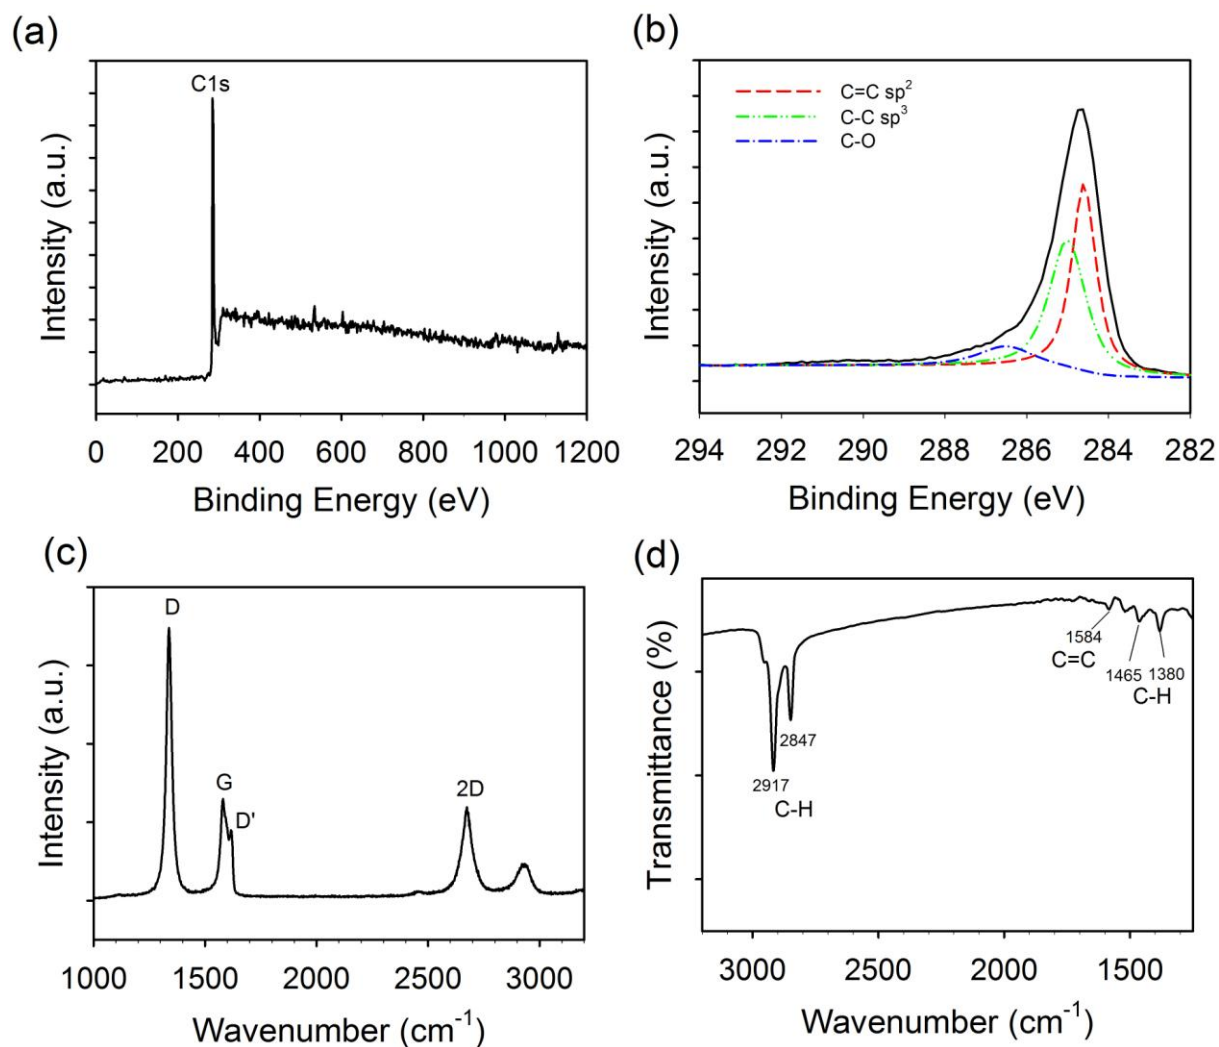

**Fig. S9** Structural and chemical composition characterization of PAGenes. (a) XPS survey scan spectrum, (b) C1s high resolution XPS spectrum, (c) Raman spectrum, and (d) FTIR spectrum.



## 9. Structural, chemical composition, and optical properties of OAGQDs

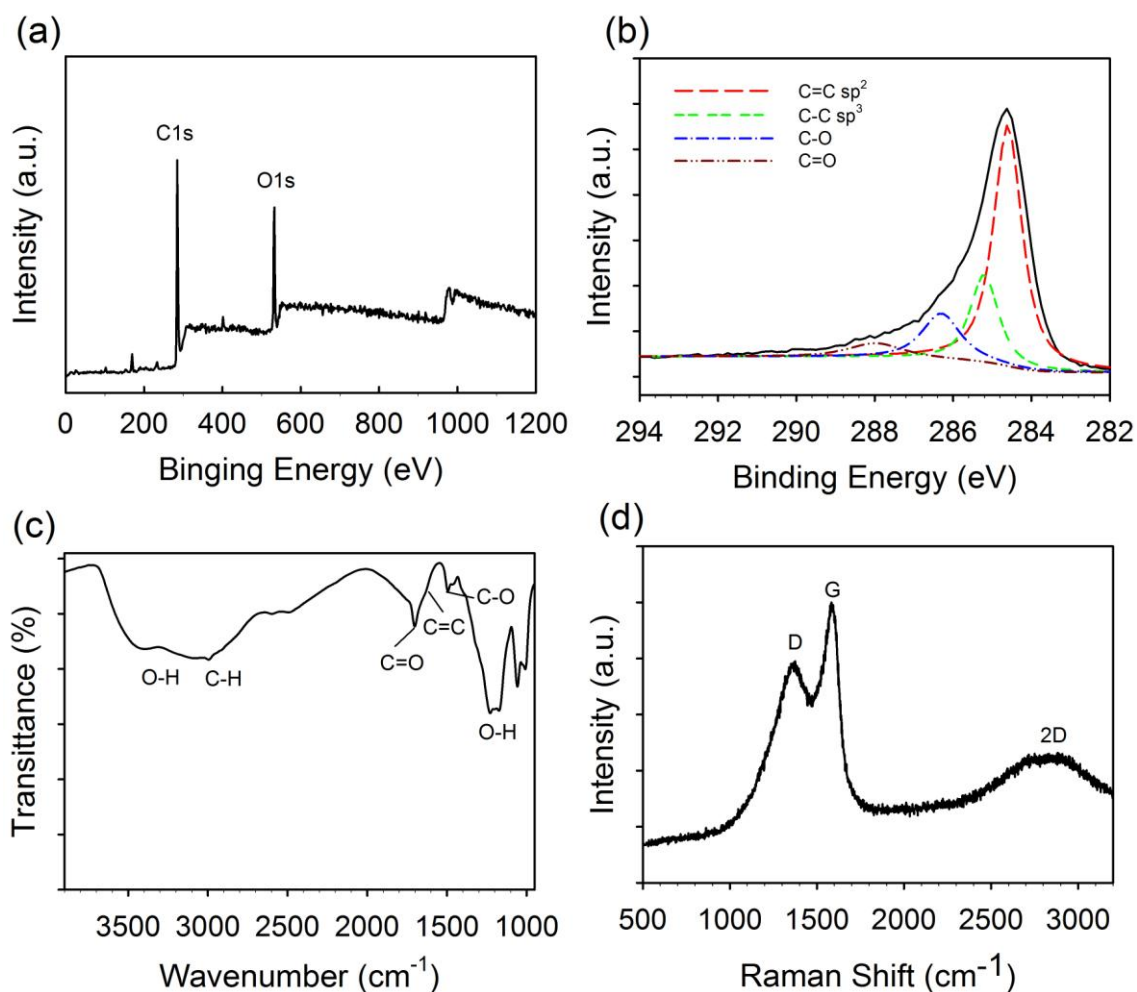

**Fig. S10** Structural and chemical characterization of OAGQDs. (a) XPS survey scan spectrum, (b) C1s high resolution XPS spectrum, (c) FTIR spectrum, and (d) Raman spectrum.

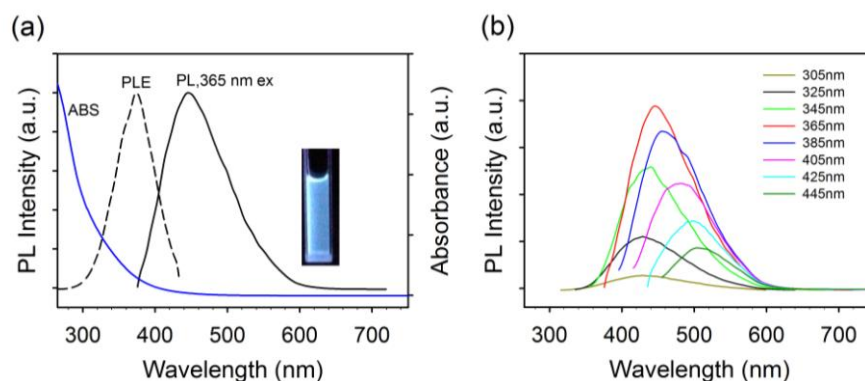

**Fig. S11** Optical properties of OAGQDs. (a) UV-Vis absorption spectrum (ABS), PL spectrum at 365 nm excitation, and PLE spectrum with the detection wavelength of 445 nm of OAGQDs in water dispersion (inset: photograph taken under 365 nm UV light irradiation), (c) the excitation-dependent PL behaviors of synthesized OAGQDs.

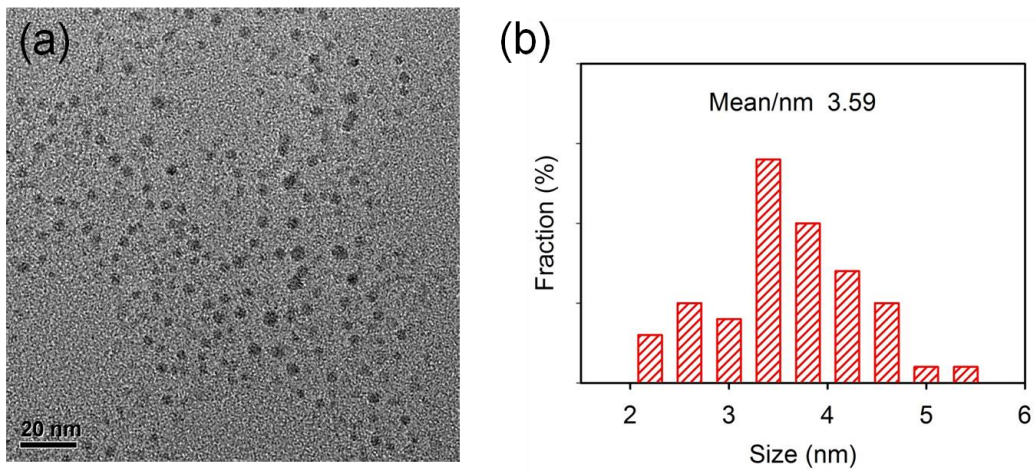

**Fig. S12** TEM image (a) and size distribution (b) of OAGQDs.
